# Supplementary material for: Mass production of SiC/SiOx nanochain heterojunctions with high purities
Source: Royal Society of Chemistry journal article supplement (doi:10.1039/c3ce27019j), 2013-01-01
Supplement: c3ce27019j.pdf [file c3ce27019j.pdf]

## *Electronic Supplementary Information*

### **Mass Production of SiC/SiO<sub>x</sub> Nanochain Heterojunctions with High Purities**

*Huilin Hou<sup>1,2</sup>, Lin Wang<sup>2</sup>, Fengmei Gao<sup>2</sup>, Guodong Wei<sup>2</sup>, Jinju Zheng<sup>2</sup>, Xiaomin Cheng<sup>3</sup>, Bin Tang<sup>1,\*</sup>, and Weiyong Yang<sup>2,\*</sup>*

<sup>1</sup> Research Institute of Surface Engineering, Taiyuan University of Technology, Taiyuan, 030024, P.R. China.

<sup>2</sup> Institute of Materials, Ningbo University of Technology, Ningbo, 315016, P.R. China.

<sup>3</sup> School of Mechanical Engineering, Ningbo University of Technology, Ningbo, 315016, P.R. China.

**Corresponding author E-mails:** [tangbin@tyut.edu.cn](mailto:tangbin@tyut.edu.cn) (B. Tang)

[weiyouyang@tsinghua.org.cn](mailto:weiyouyang@tsinghua.org.cn) (W. Yang)

**Tel:** +86-574-87080966

**Fax:** +86-574-87081221

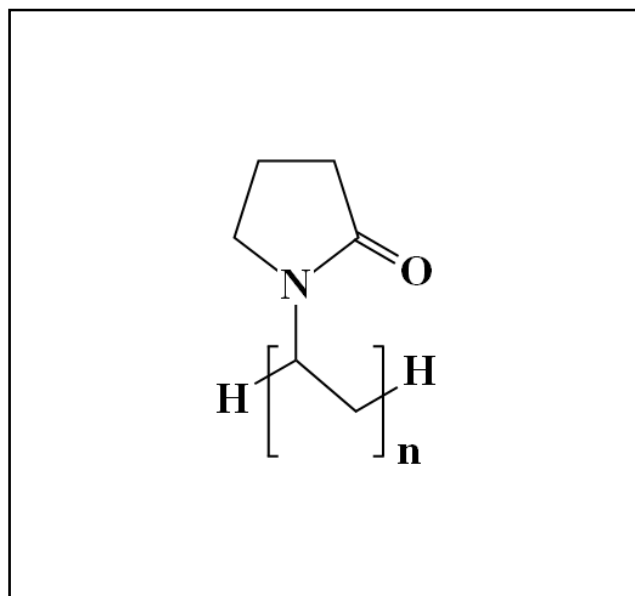

**Figure S1.** Molecular structures of PVP.



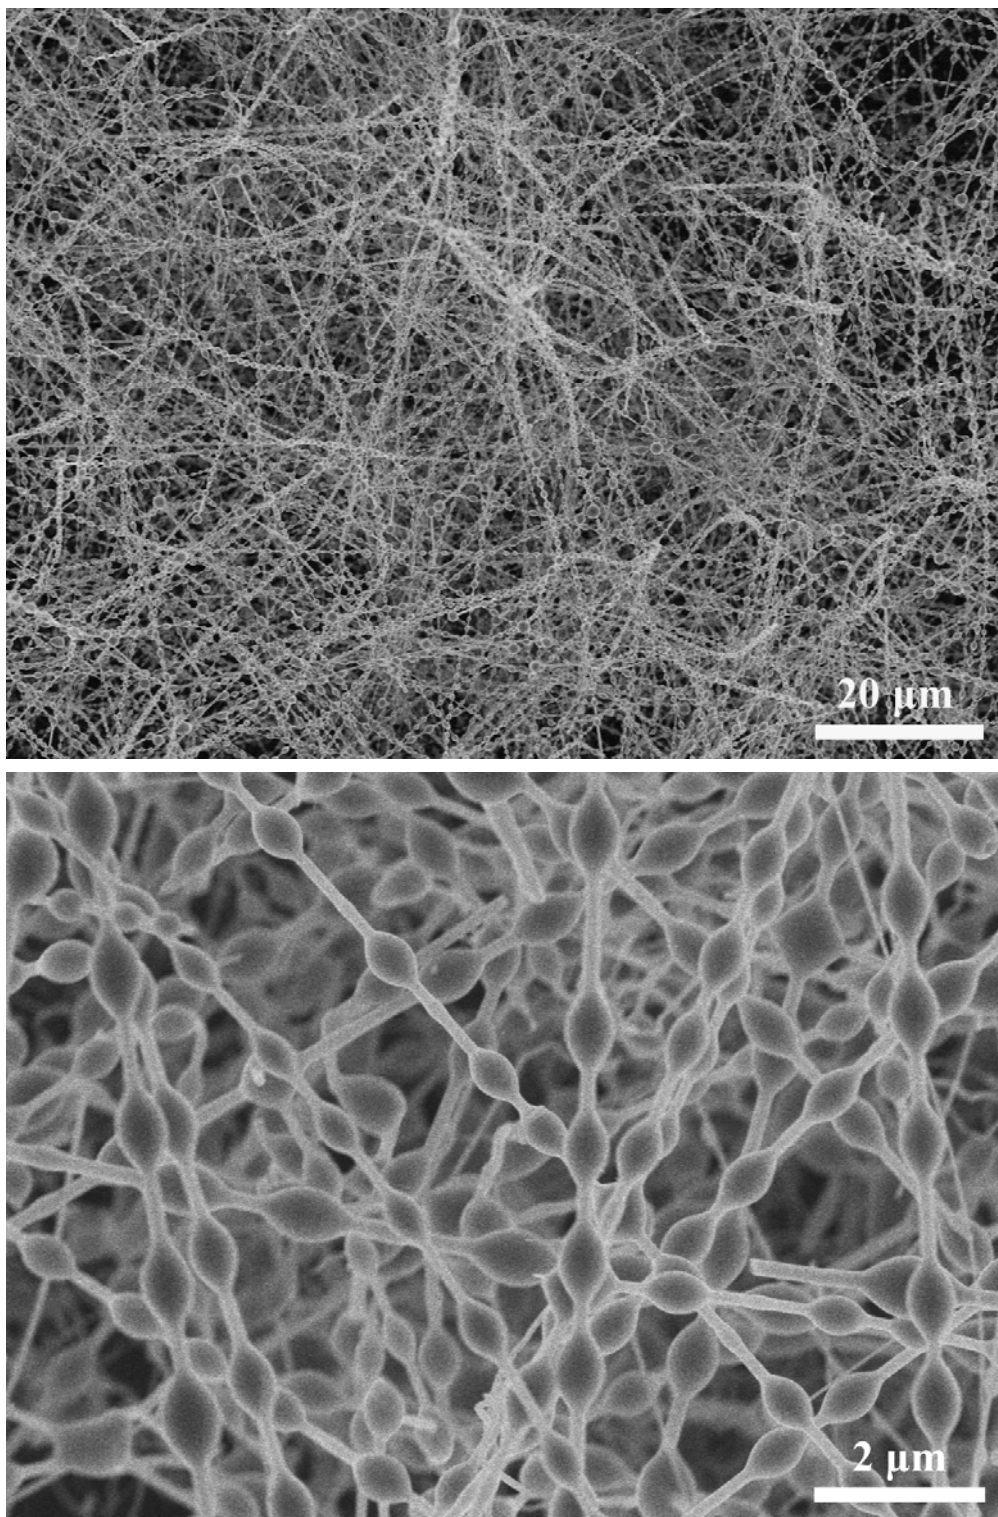

**Figure S3.** Typical SEM images of the resultant nanostructures of Sample C under different magnifications.

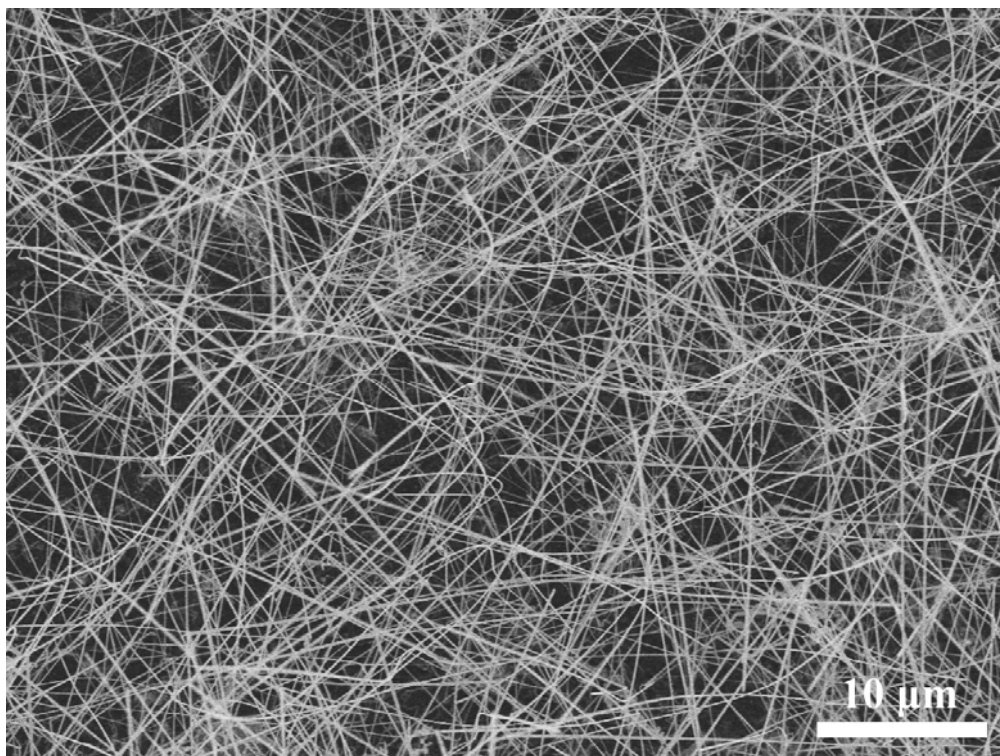

**Figure S4.** A typical SEM image of the resultant nanostructures of Sample A under a low magnification.



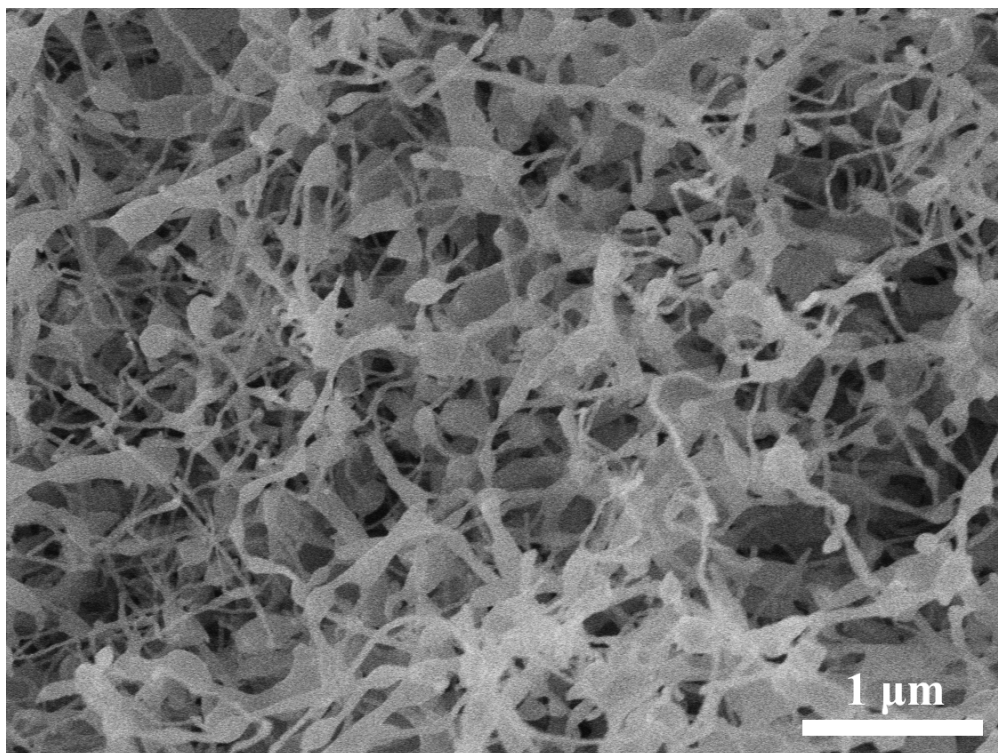

**Figure S5.** A typical SEM image of the resultant nanostructures of Sample B under a low magnification.

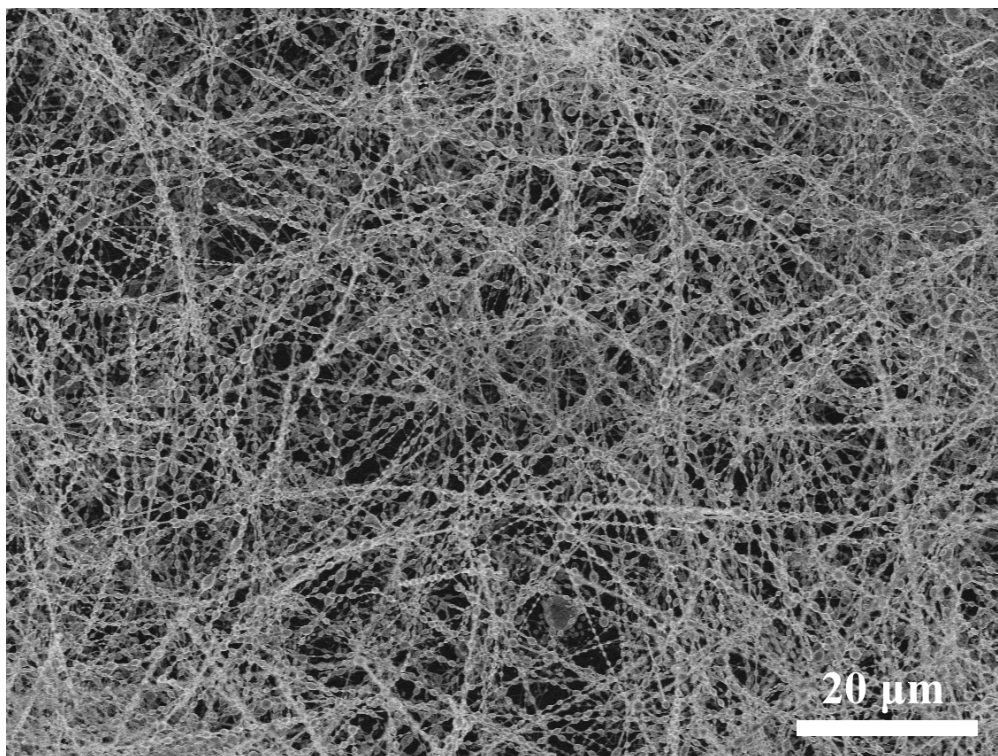

**Figure S6.** A representative SEM image of the resultant nanostructures of Sample D under a low magnification.

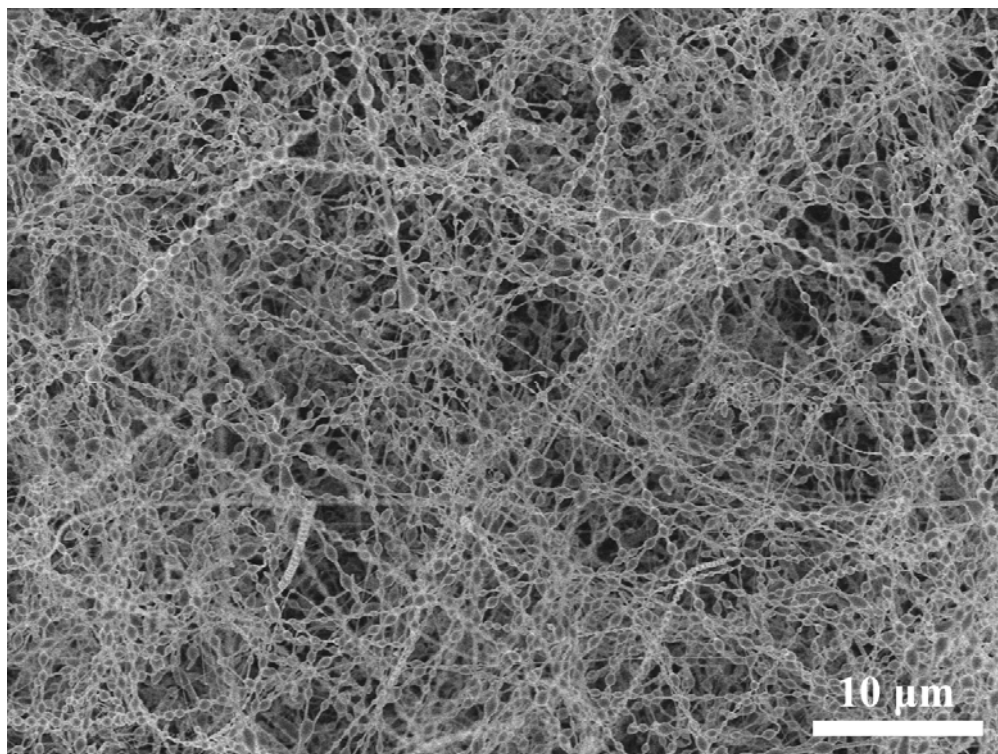

**Figure S7.** A representative SEM image of the resultant nanostructures of Sample E under a low magnification.
